# Supplementary material for: Artificial Intelligence and Acute Appendicitis: A Systematic Review of Diagnostic and Prognostic Models
Source: Springer Nature journal article supplement (doi:10.1186/s13017-023-00527-2), 2023-12-19

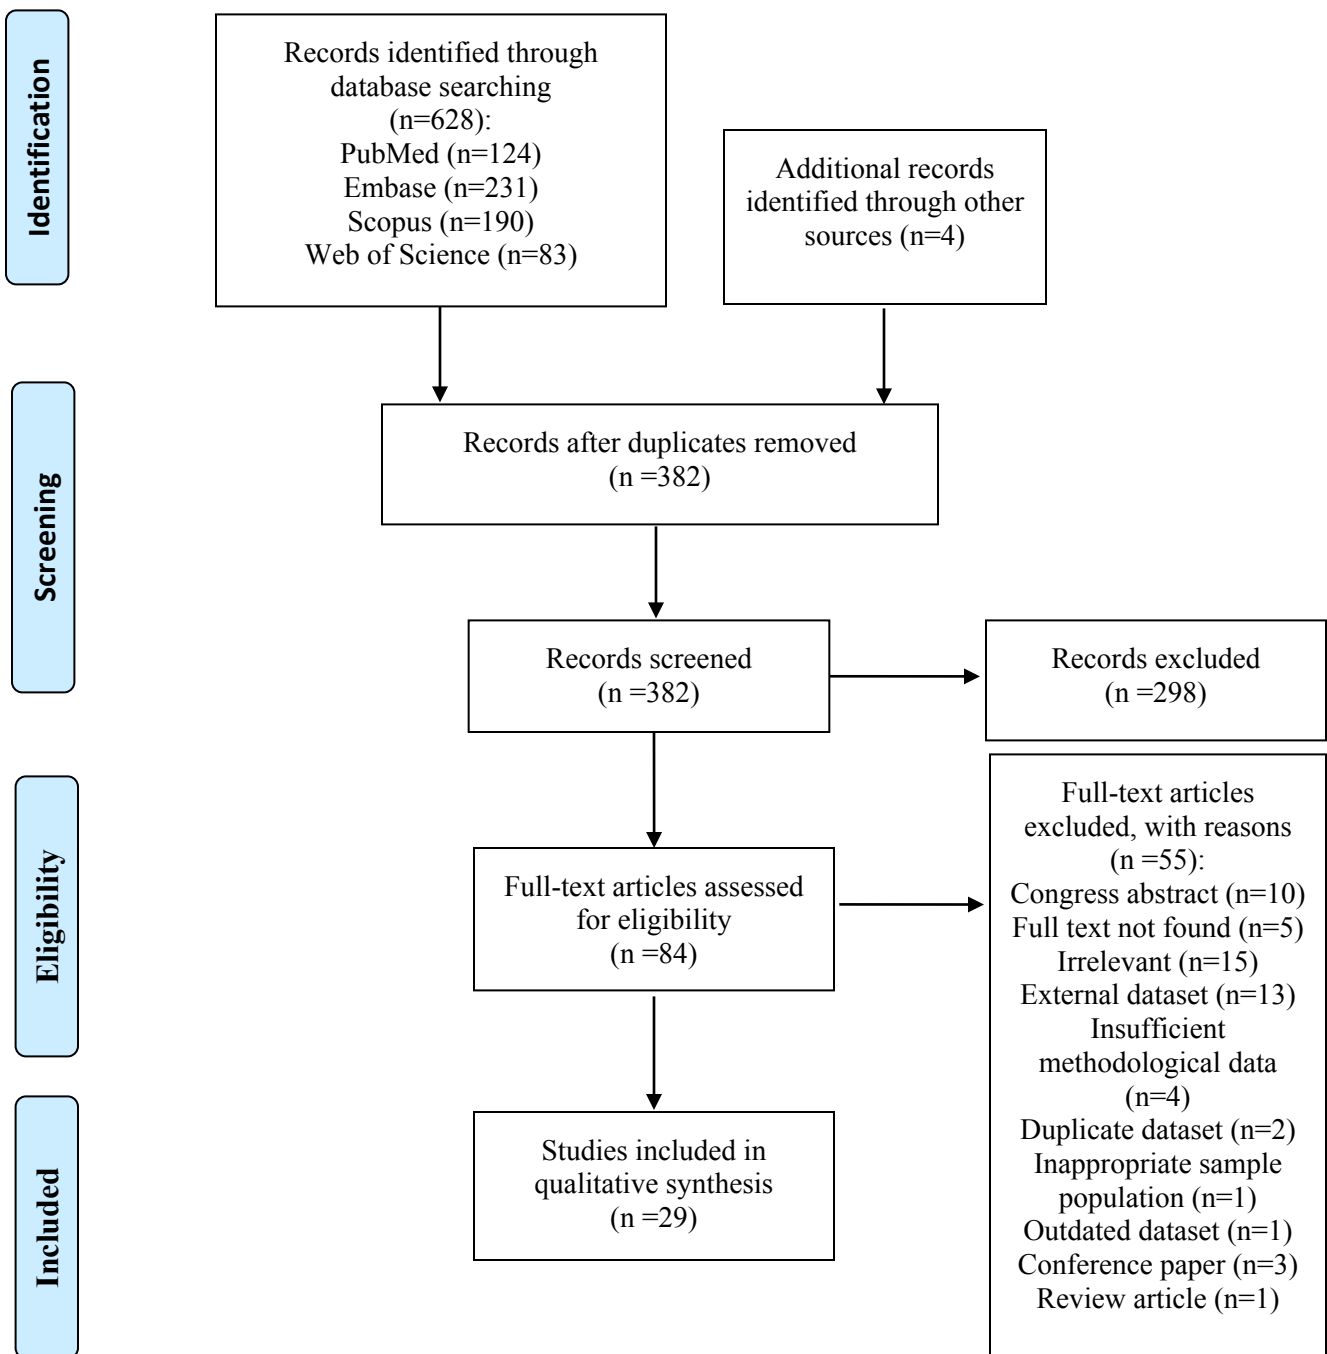

Supplement: MOESM3 [file 13017_2023_527_MOESM3_ESM.pdf]
